# Supplementary material for: Host(beta zeolite)–guest (copper(ii)–methyladenine complex) nanomaterials: synthesis and characterization
Source: Royal Society of Chemistry journal article supplement (doi:10.1039/b807904h), 2008-01-01
Supplement: b807904h.pdf [file b807904h.pdf]

Supplementary Information Presented with the Paper Entitled

## Host(Beta Zeolite)-Guest (Copper(II)-Methyladenine complex) Nanomaterials: Synthesis and Characterization

Catarina Teixeira,<sup>a</sup> Paolo Pescarmona,<sup>b</sup> M. Alice Carvalho,<sup>a</sup>  
António M. Fonseca\*<sup>a</sup> and Isabel C. Neves\*<sup>a</sup>

<sup>a</sup>Departamento de Química, Centro de Química, Universidade do Minho, Campus de Gualtar, 4710-057 Braga, Portugal - E-mail: [amcf@quimica.uminho.pt](mailto:amcf@quimica.uminho.pt) and [ineves@quimica.uminho.pt](mailto:ineves@quimica.uminho.pt)

<sup>b</sup>Centre for Surface Chemistry and Catalysis, K.U. Leuven, Kasteelpark Arenberg 23, 3001 Heverlee, Belgium

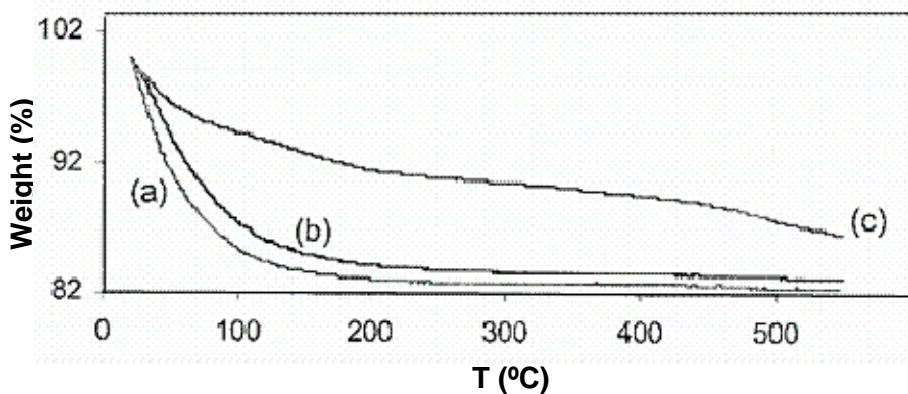

**Figure S1.** Dynamic thermogravimetric curves obtained for the samples (TGA): (a) NaBEA, (b) Cu-NaBEA and (c) CuL-NaBEA.

From the thermogravimetric results (Figure S1) the host NaBEA (curve a) shows a significant weight loss near 150 °C, which can be attributed to the removal of intra-zeolite water, similar to that usually observed to other zeolites. After immobilization of copper complex (curve c), two major stages of weight loss can be evidenced in a broad temperature range (*i.e.* 80-500 °C). The first stage occurs at 140 °C and is due to the contributions from the physisorbed water within the zeolite structure. For temperature near 480 °C, the weight loss is associated with progressive decomposition of the immobilized complex.
